# Supplementary material for: Ligiamycins A and B, Decalin-Amino-Maleimides from the Co-Culture of Streptomyces sp. and Achromobacter sp. Isolated from the Marine Wharf Roach, Ligia exotica
Source: MDPI journal article supplement (doi:10.3390/md20020083), 2022-01-18
Supplement: s1 [file s1]

## *Supplementary Material for*

# **Ligiamycins A and B, Decalin-Amino-Maleimides from Co-culture of *Streptomyces* sp. and *Achromobacter* sp. isolated from the Marine Wharf Roach, *Ligia exotica***

Hyung-Ju Lim <sup>1,†</sup>, Joon Soo An <sup>1,†</sup>, Eun Seo Bae <sup>1</sup>, Eunji Cho <sup>2</sup>, Sunghoon Hwang <sup>1</sup>, Sang-Jip Nam <sup>3</sup>, Ki-Bong Oh <sup>2</sup>, Sang Kook Lee <sup>1</sup> and Dong-Chan Oh <sup>1,\*</sup>

<sup>1</sup>Natural Products Research Institute, College of Pharmacy, Seoul National University, Seoul 08826, Republic of Korea; limju012@snu.ac.kr (H.-J.L.); ahnjunsoo@snu.ac.kr (J.S.A.); ddol1289@snu.ac.kr (E.S.B.); sunghooi@snu.ac.kr (S.H.); sklee61@snu.ac.kr (S.K.L.)

<sup>2</sup>Department of Agriculture Biotechnology, College of Agriculture and Life Sciences, Seoul National University, Seoul 08826, Republic of Korea; eunji525@snu.ac.kr (E.C.); ohkibong@snu.ac.kr (K.-B.O.)

<sup>3</sup>Department of Chemistry and Nanoscience, Ewha Womans University, Seoul 03760, Republic of Korea; sjnam@ewha.ac.kr (S.-J.N.)

<sup>†</sup>These authors contributed equally to this work.

### **Corresponding Author**

\* D.-C. Oh, Tel: +82-2-880-2491, Fax: +82-2-762-8322, E-mail: dongchanoh@snu.ac.kr.

## Table of Contents

- Figure S1.**  $^1\text{H}$  NMR spectrum (800 MHz) of ligiamycin A (**1**) in  $\text{DMSO-}d_6$ .
- Figure S2.**  $^{13}\text{C}$  NMR spectrum (200 MHz) of ligiamycin A (**1**) in  $\text{DMSO-}d_6$ .
- Figure S3.** COSY NMR spectrum (800 MHz) of ligiamycin A (**1**) in  $\text{DMSO-}d_6$ .
- Figure S4.** HSQC NMR spectrum (800 MHz) of ligiamycin A (**1**) in  $\text{DMSO-}d_6$ .
- Figure S5.** HMBC NMR spectrum (800 MHz) of ligiamycin A (**1**) in  $\text{DMSO-}d_6$ .
- Figure S6.** ROESY NMR spectrum (800 MHz) of ligiamycin A (**1**) in  $\text{DMSO-}d_6$ .
- Figure S7.** Expanded ROESY NMR spectrum (800 MHz) of ligiamycin A (**1**) in  $\text{DMSO-}d_6$ .
- Figure S8.**  $^1\text{H-}^{15}\text{N}$  HSQC NMR spectrum (850 MHz) of ligiamycin A (**1**) in  $\text{DMSO-}d_6$ .
- Figure S9.**  $^1\text{H}$  NMR spectrum (800 MHz) of ligiamycin B (**2**) in  $\text{DMSO-}d_6$ .
- Figure S10.**  $^{13}\text{C}$  NMR spectrum (200 MHz) of ligiamycin B (**2**) in  $\text{DMSO-}d_6$ .
- Figure S11.** COSY NMR spectrum (800 MHz) of ligiamycin B (**2**) in  $\text{DMSO-}d_6$ .
- Figure S12.** HSQC NMR spectrum (800 MHz) of ligiamycin B (**2**) in  $\text{DMSO-}d_6$ .
- Figure S13.** HMBC NMR spectrum (800 MHz) of ligiamycin B (**2**) in  $\text{DMSO-}d_6$ .
- Figure S14.** ROESY NMR spectrum (800 MHz) of ligiamycin B (**2**) in  $\text{DMSO-}d_6$ .
- Figure S15.** HR-ESI-MS data of ligiamycin A (**1**).
- Figure S16.** HR-FAB-MS data of ligiamycin B (**2**).
- Table S1.** Composition of isolation agar media.
- Figure S17.** Energy-minimized conformations of (a) ligiamycin A (**1**) and (b) ligiamycin B (**2**).
- Figure S18.** LC/MS traces (ion counts) of ion extraction for the ion  $[\text{M-H}]^-$  at  $m/z$  331 (ligiamycin B) (a) in a pure culture of *Streptomyces* sp. GET02.ST, (b) in a pure culture of *Achromobacter* sp. GET02.AC, and (c) in a co-culture. The LC/MS analyses were acquired with 10%–100% aqueous  $\text{CH}_3\text{CN}$  over 20 min.
- Table S2.** Cartesian coordinates of ligiamycins A (**1**) and B (**2**).
- Table S3.** ECD calculations of ligiamycins A (**1**) and B (**2**).
- Figure S19.** Comparison of the experimental ECD data of ligiamycin A (**1**) with the calculated ECD data; black line: experimental ECD data; blue dotted line: calculated ECD data (5*S*, 6*S*, 9*S*, 11*R*, and 14*S*); red dotted line: calculated ECD data (5*R*, 6*R*, 9*R*, 11*S*, and 14*R*).
- Figure S20.** Comparison of the experimental ECD data of ligiamycin B (**2**) with the calculated ECD data; black line: experimental ECD data; blue dotted line: calculated ECD data (5*S*, 6*S*, 9*S*, 11*R*, 14*S*); red dotted line: calculated ECD data (5*R*, 6*R*, 9*R*, 11*S*, 14*R*).
- Proposed biosynthetic pathway of ligiamycins A (**1**) and B (**2**).**
- Scheme S1.** Proposed biosynthetic pathway of ligiamycins. PKS-NRPS domain abbreviations: KS: ketosynthase; DH: dehydratase; MT: methyltransferase; KR: ketoreductases; ACP: acyl carrier protein; C: condensation; A: adenylation; T: thiolation; R: reductase; ER: enoylreductase.

## Reference

**Figure S1.**  $^1\text{H}$  NMR spectrum (850 MHz) of ligiamycin A (**1**) in  $\text{DMSO-}d_6$ .

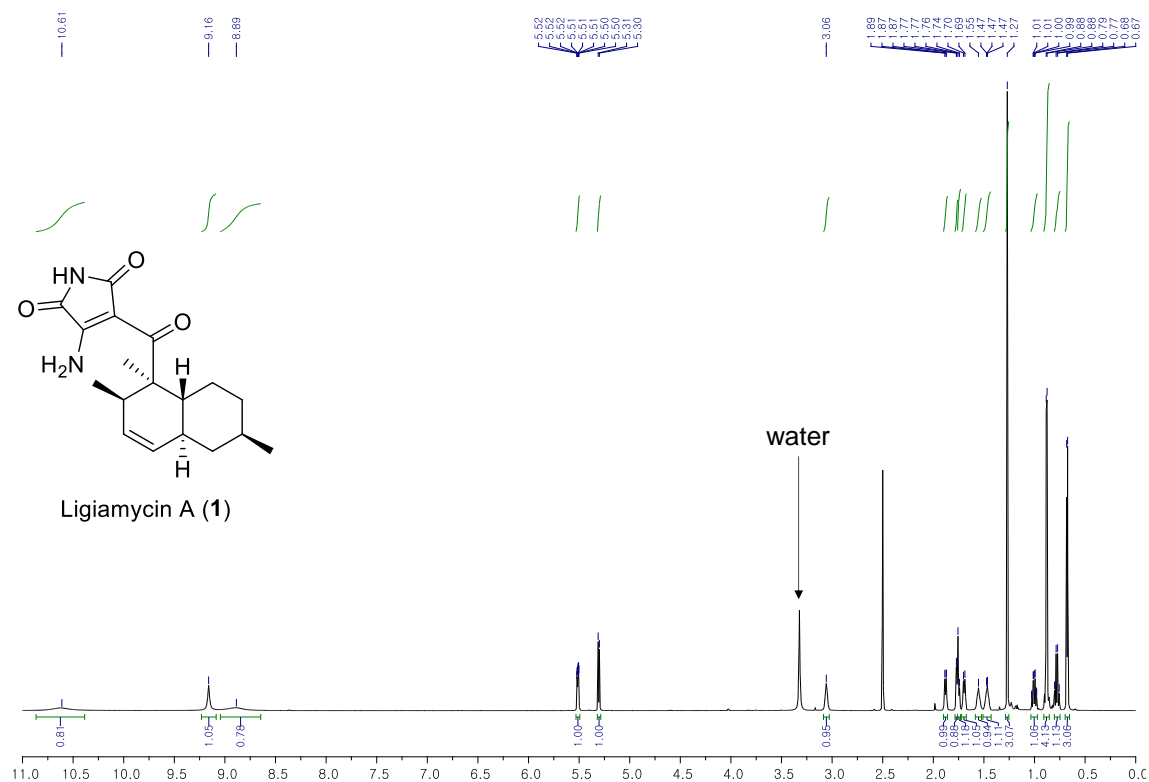

**Figure S2.**  $^{13}\text{C}$  NMR spectrum (215.5 MHz) of ligiamycin A (**1**) in  $\text{DMSO-}d_6$ .

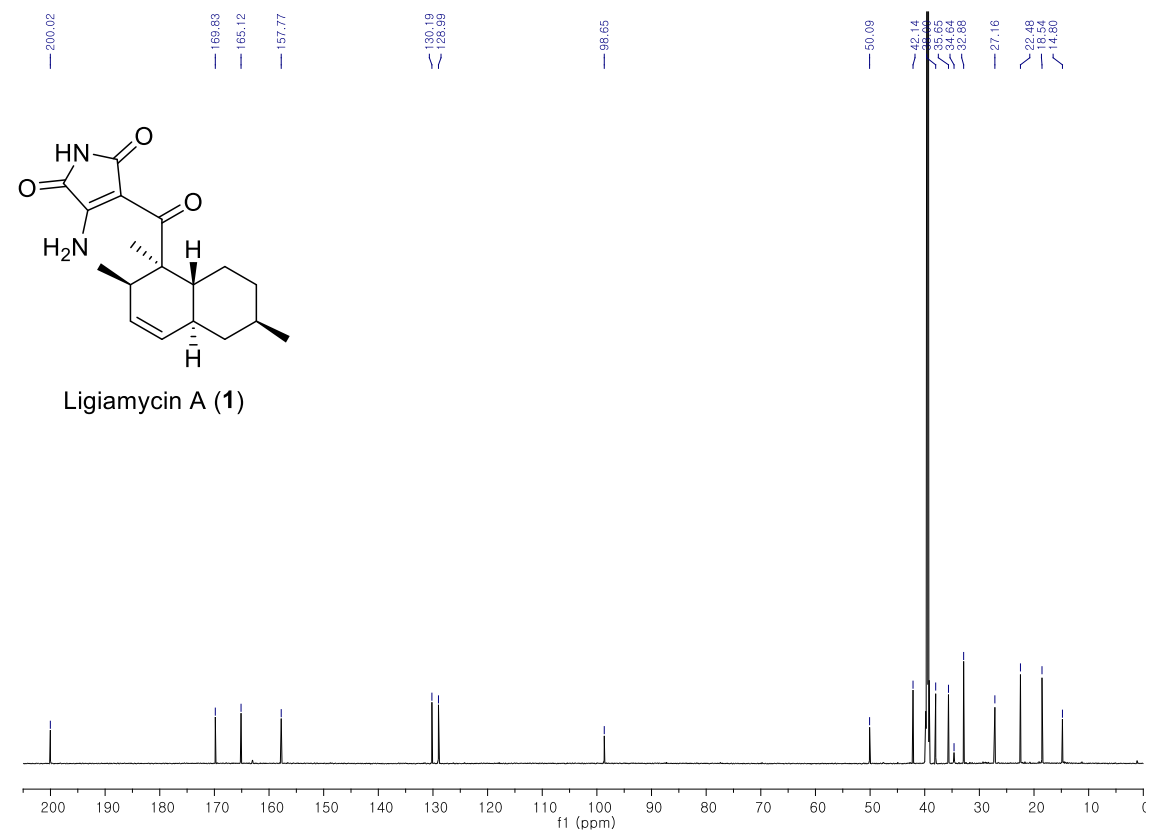

**Figure S3.** COSY NMR spectrum (800 MHz) of ligiamycin A (**1**) in DMSO-*d*<sub>6</sub>.

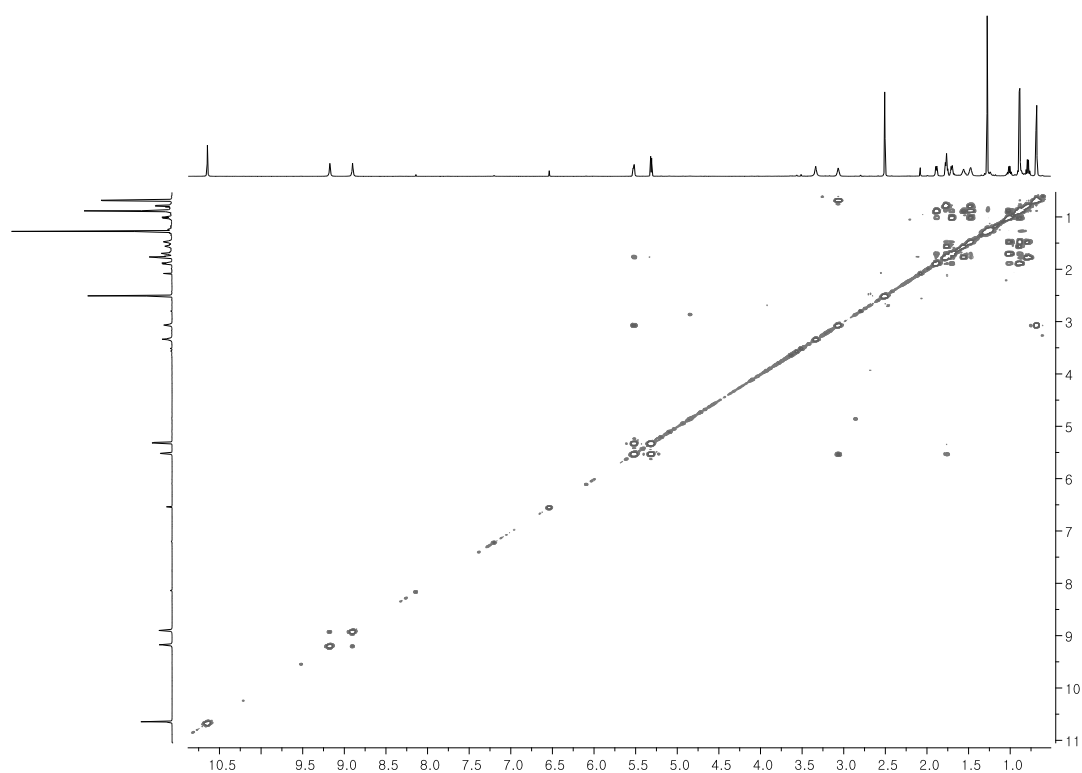

**Figure S4.** HSQC NMR spectrum (800 MHz) of ligiamycin A (**1**) in DMSO-*d*<sub>6</sub>.

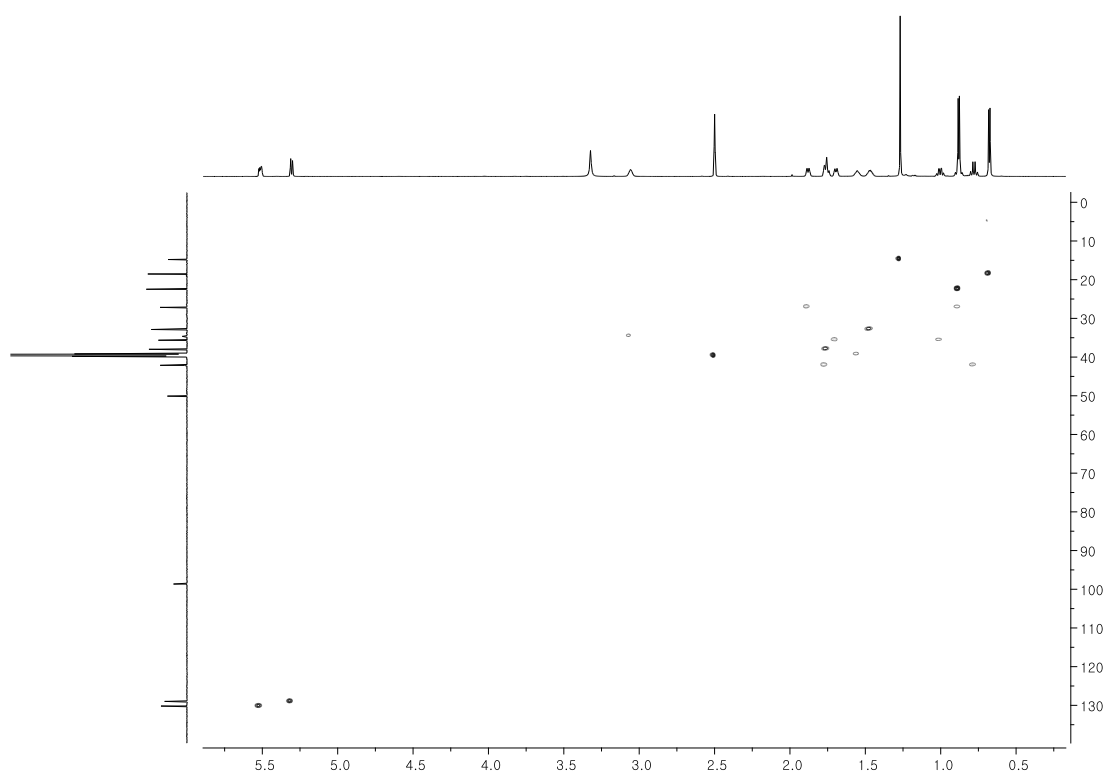

**Figure S5.** HMBC NMR spectrum (800 MHz) of ligiamycin A (**1**) in DMSO-*d*<sub>6</sub>.

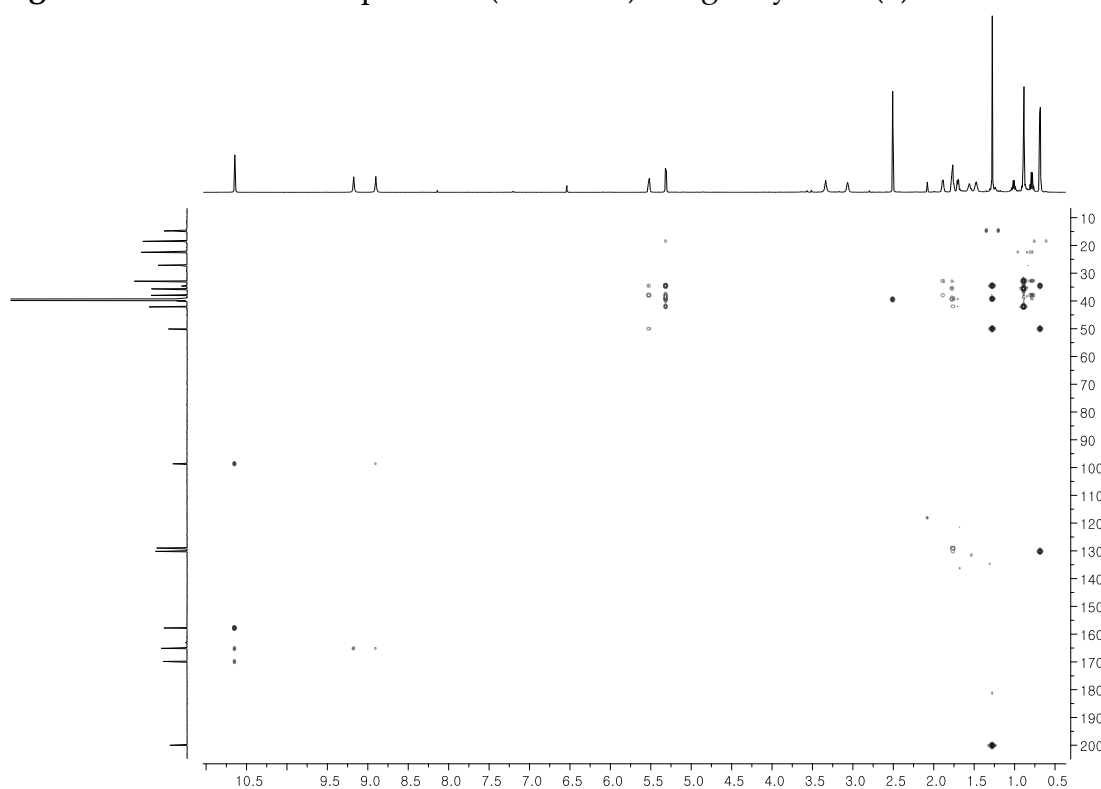

**Figure S6.** ROESY NMR spectrum (800 MHz) of ligiamycin A (**1**) in DMSO-*d*<sub>6</sub>.

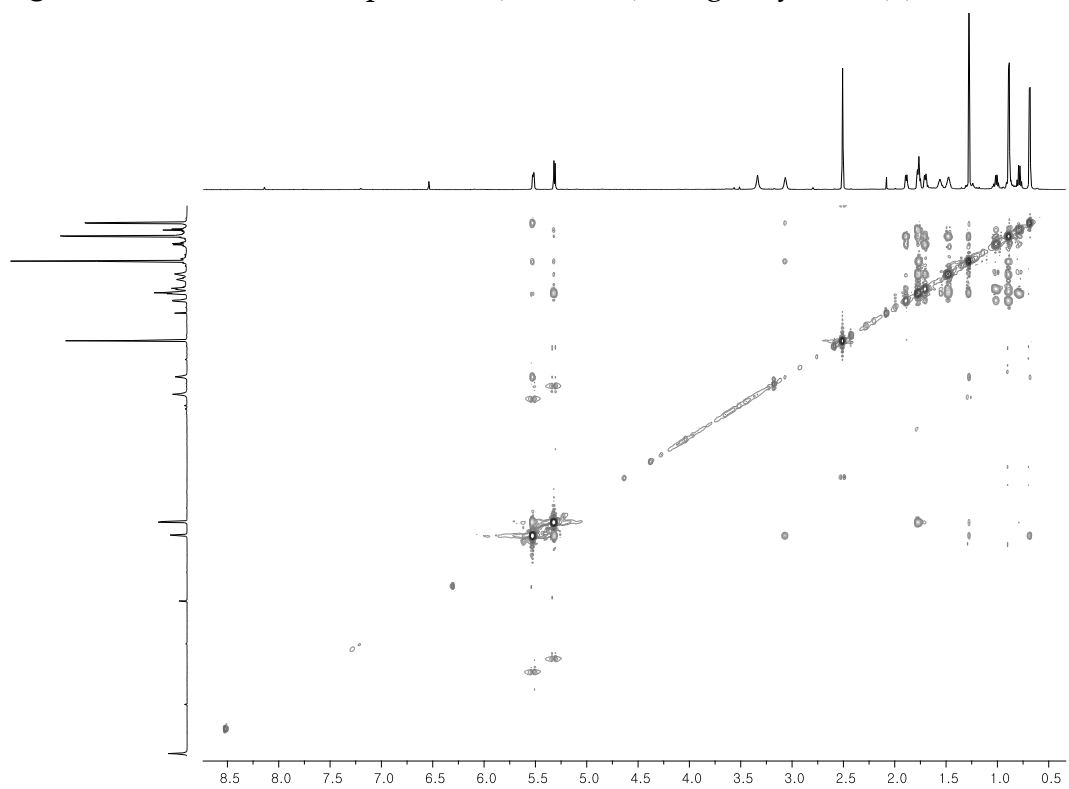

**Figure S7.** Expanded ROESY NMR spectrum (800 MHz) of ligiamycin A (**1**) in DMSO-*d*<sub>6</sub>.

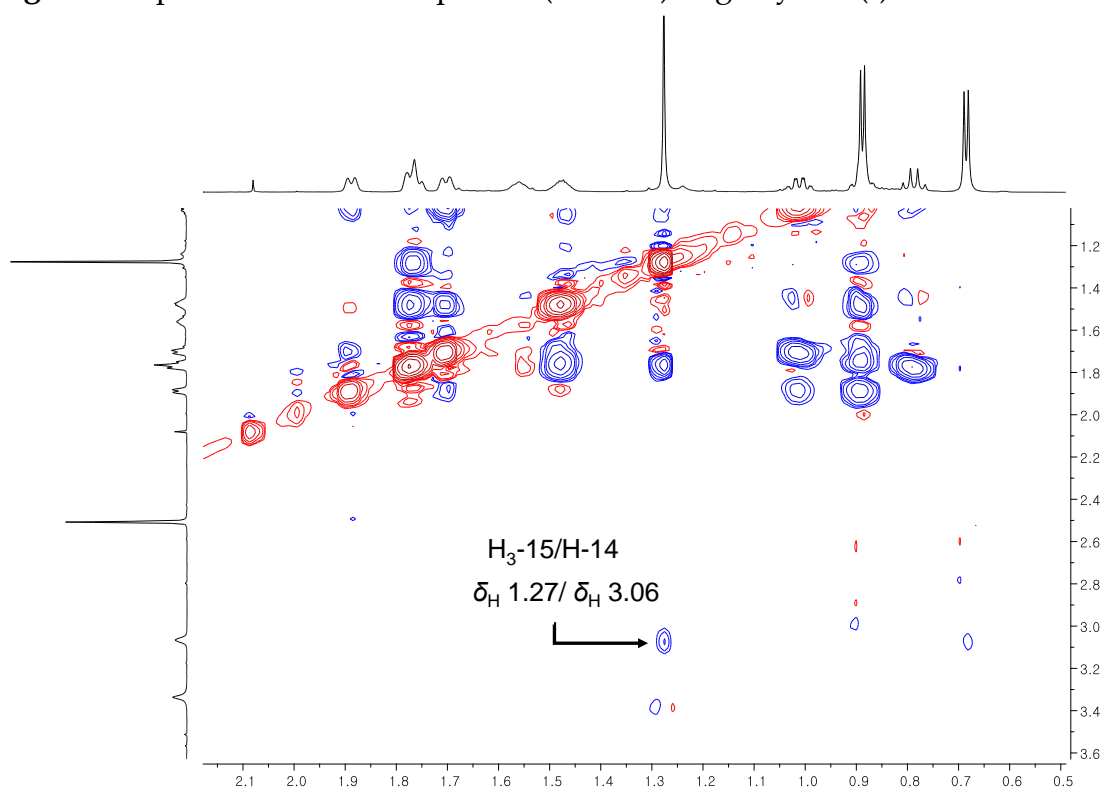

**Figure S8.**  $^1H$ - $^{15}N$  HSQC NMR spectrum (850 MHz) of ligiamycin A (**1**) in DMSO-*d*<sub>6</sub>.

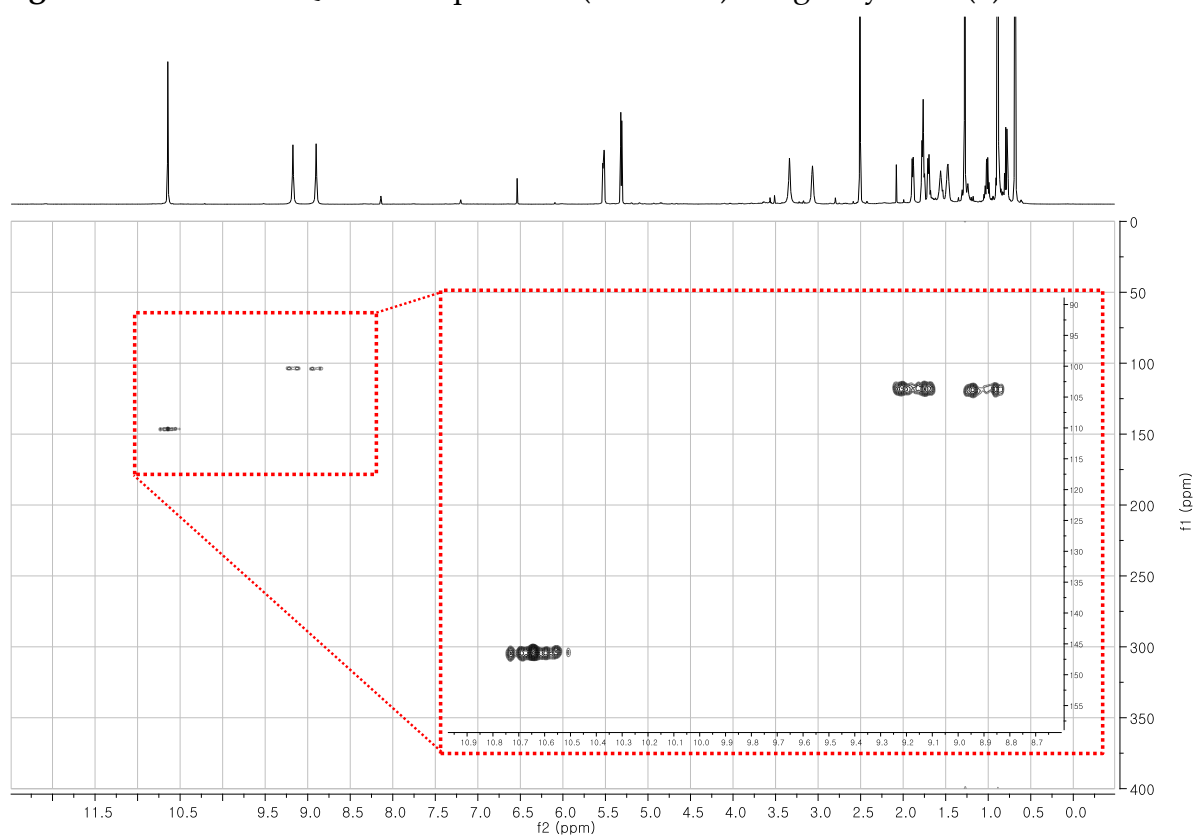

**Figure S9.**  $^1\text{H}$  NMR spectrum (800 MHz) of ligiamycin B (**2**) in  $\text{DMSO}-d_6$ .

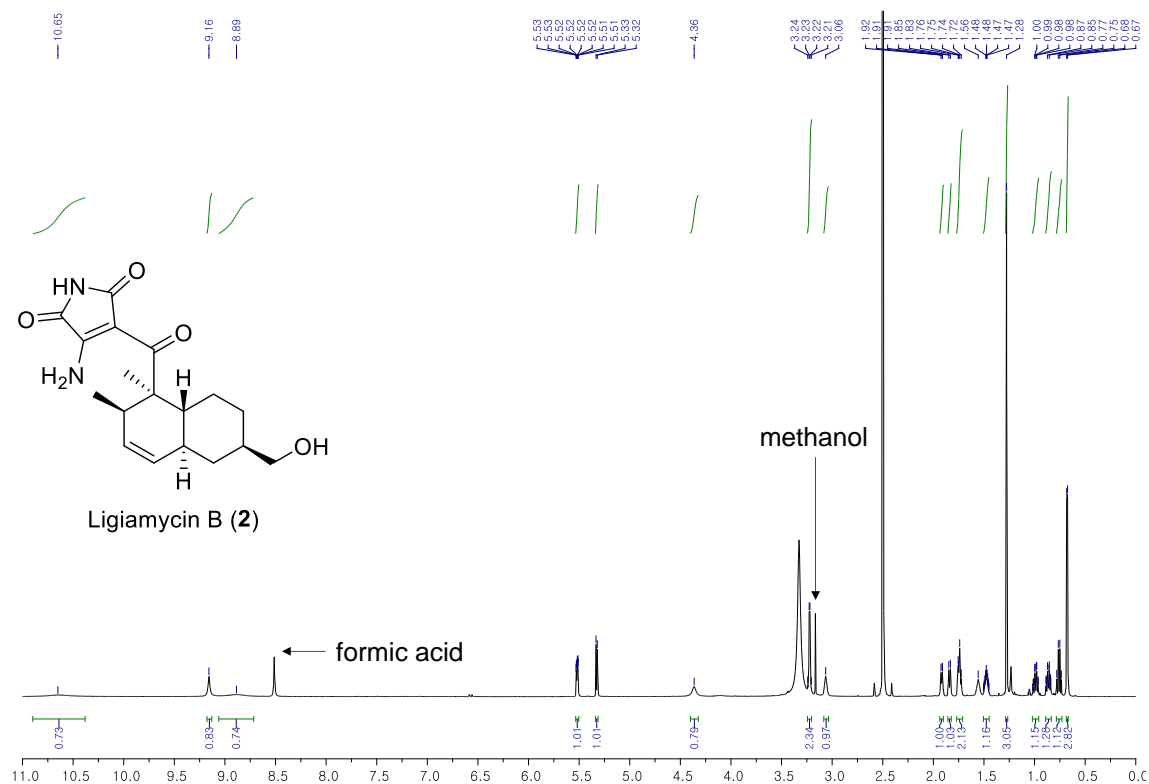

**Figure S10.**  $^{13}\text{C}$  NMR spectrum (200 MHz) of ligiamycin B (**2**) in  $\text{DMSO}-d_6$ .

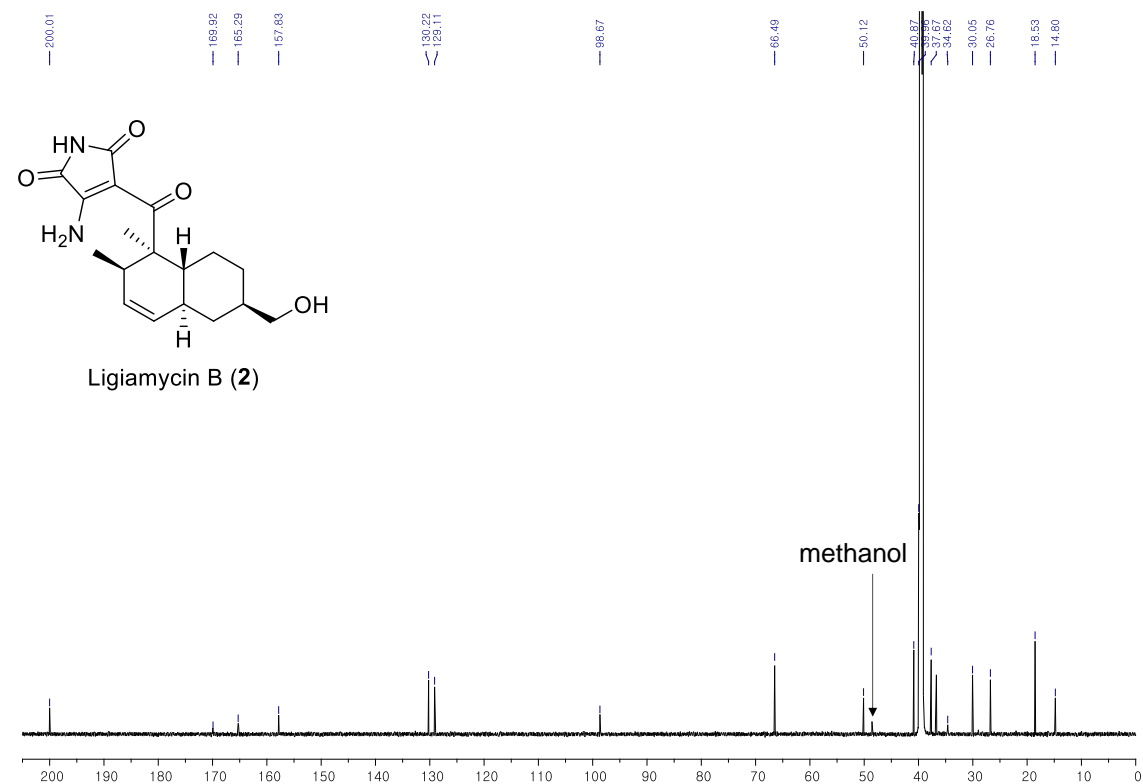

**Figure S11.** COSY NMR spectrum (800 MHz) of ligiamycin B (**2**) in DMSO-*d*<sub>6</sub>.

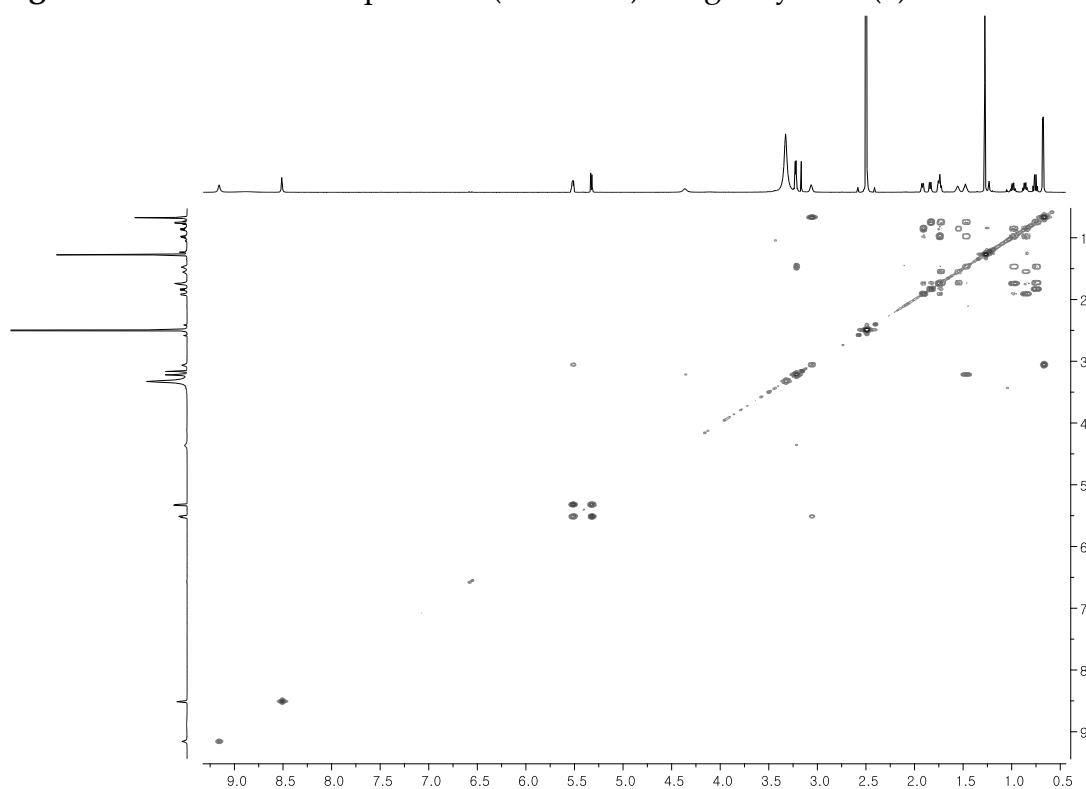

**Figure S12.** HSQC NMR spectrum (800 MHz) of ligiamycin B (**2**) in DMSO-*d*<sub>6</sub>.

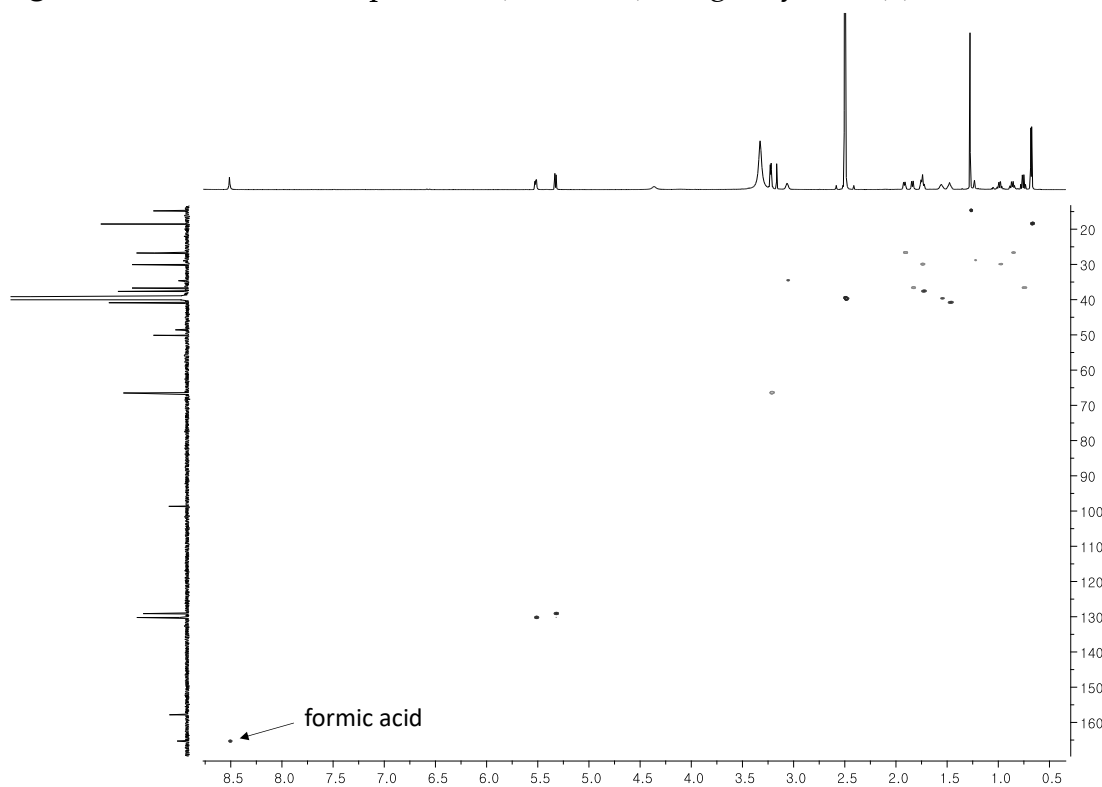



**Figure S13.** HMBC NMR spectrum (800 MHz) of ligiamycin B (**2**) in DMSO-*d*<sub>6</sub>.

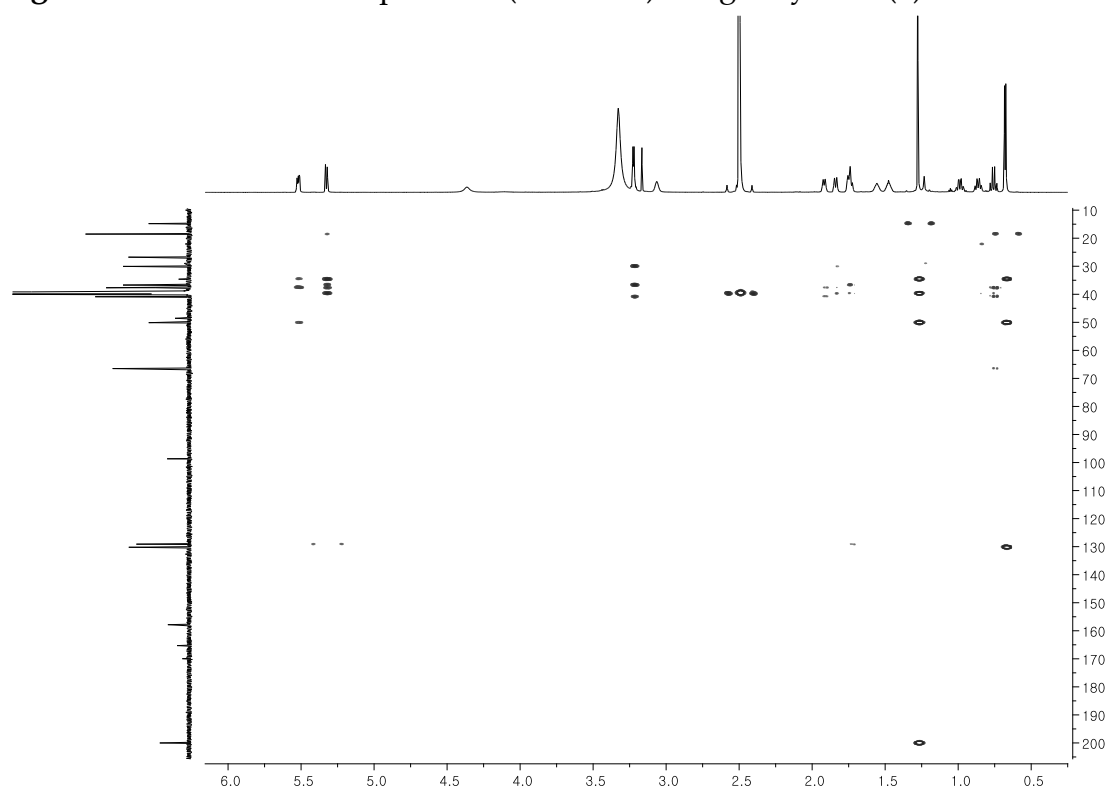

**Figure S14.** ROESY NMR spectrum (800 MHz) of ligiamycin B (**2**) in DMSO-*d*<sub>6</sub>.

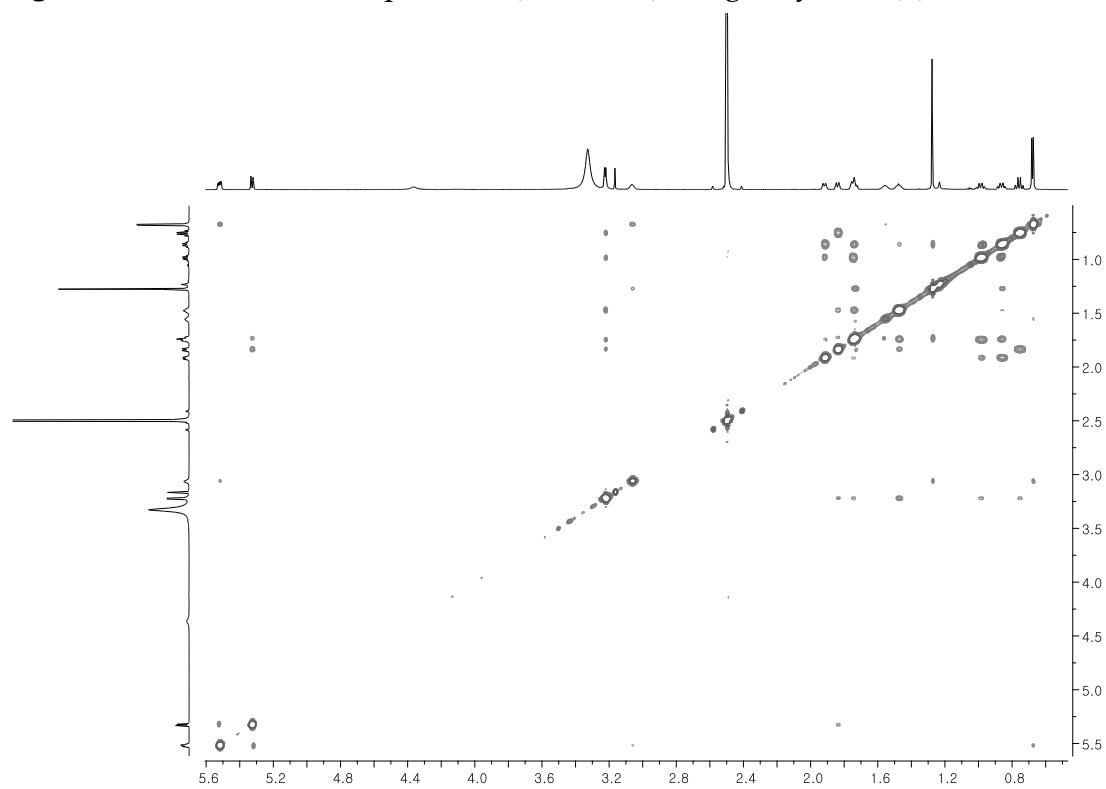

**Figure S15.** HR-ESI-MS data of ligiamycin A (1).

Spectrum from GETO2\_P\_2.wiff (sample 1) - GETO2\_P\_2, Experiment 1, +TOF MS (100 - 2000) from 0.328 min

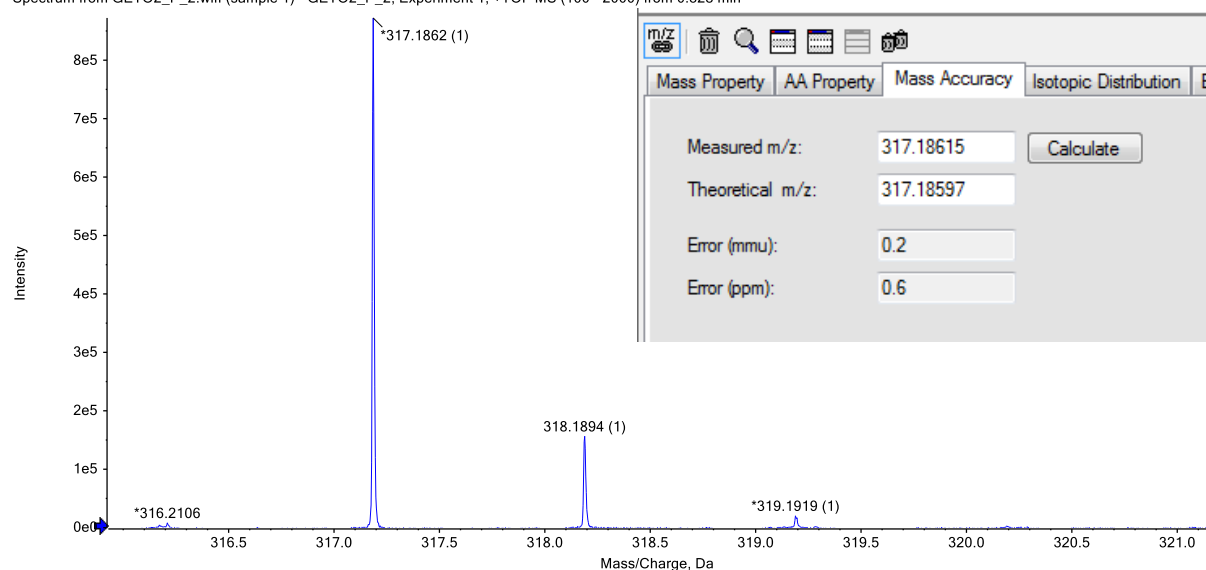

**Figure S16.** HR-FAB-MS data of ligiamycin B (2).

Data : FAB502 Date : 12-Jan-2020 21:46

Instrument : MStation

Sample : GETO2

Note : m-NBA

Inlet : Direct Ion Mode : FAB+

RT : 0.15 min Scan# : (6,9)

Elements : C 100/0, H 100/0, N 5/0, O 10/0

Mass Tolerance : 1000ppm, 5mmu if m/z < 5, 10mmu if m/z > 10

Unsaturation (U.S.) : -0.5 - 15.0

|   | Observed m/z | Int% | Err [ppm / mmu] | U.S. | Composition   |
|---|--------------|------|-----------------|------|---------------|
| 1 | 333.1816     | 1.61 | -7.5 / -2.5     | 12.0 | C21 H23 N3 O  |
| 2 |              |      | -11.6 / -3.9    | 11.5 | C23 H25 O2    |
| 3 |              |      | +26.2 / +8.7    | 12.0 | C22 H23 N O2  |
| 4 |              |      | +4.5 / +1.5     | 8.0  | C16 H23 N5 O3 |
| 5 |              |      | +0.5 / +0.2     | 7.5  | C18 H25 N2 O4 |
| 6 |              |      | -25.2 / -8.4    | 3.0  | C14 H27 N3 O6 |
| 7 |              |      | +12.6 / +4.2    | 3.5  | C13 H25 N4 O6 |
| 8 |              |      | -29.2 / -9.7    | 2.5  | C16 H29 O7    |
| 9 |              |      | +8.5 / +2.8     | 3.0  | C15 H27 N O7  |

**Table S1.** Composition of isolation agar media

|                             | Composition of 1 L of distilled water                                                                                             |
|-----------------------------|-----------------------------------------------------------------------------------------------------------------------------------|
| K                           | soluble starch 25 g, soytone 15 g, yeast extract 2 g, calcium carbonate 4 g                                                       |
| Actinomycete isolation agar | actinomycete isolation agar 22 g, glycerol 5 mL                                                                                   |
| modified K                  | yeast extract 3 g, glucose 2 g, mannitol 2 g, malt extract 5 g, soluble starch 5 g, soytone 5 g, calcium carbonate 1 g, agar 18 g |
| M4                          | agar 18 g                                                                                                                         |
| M2                          | glycerol 6 mL, arginine 1g, potassium dihydrogen phosphate 1 g, magnesium sulfate 0.5 g, agar 16 g                                |
| YPM                         | yeast extract 2 g, mannitol 4 g, peptone 2 g, agar 18 g                                                                           |
| A1                          | soluble starch 10 g, yeast extract 2g, peptone 2 g, agar 18 g                                                                     |

- All isolation agar media contain cycloheximide 100 mg/L and sea salt 23 g/L.

**Figure S17.** Energy-minimized conformations of (a) ligiamycin A (**1**) and (b) ligiamycin B (**2**).

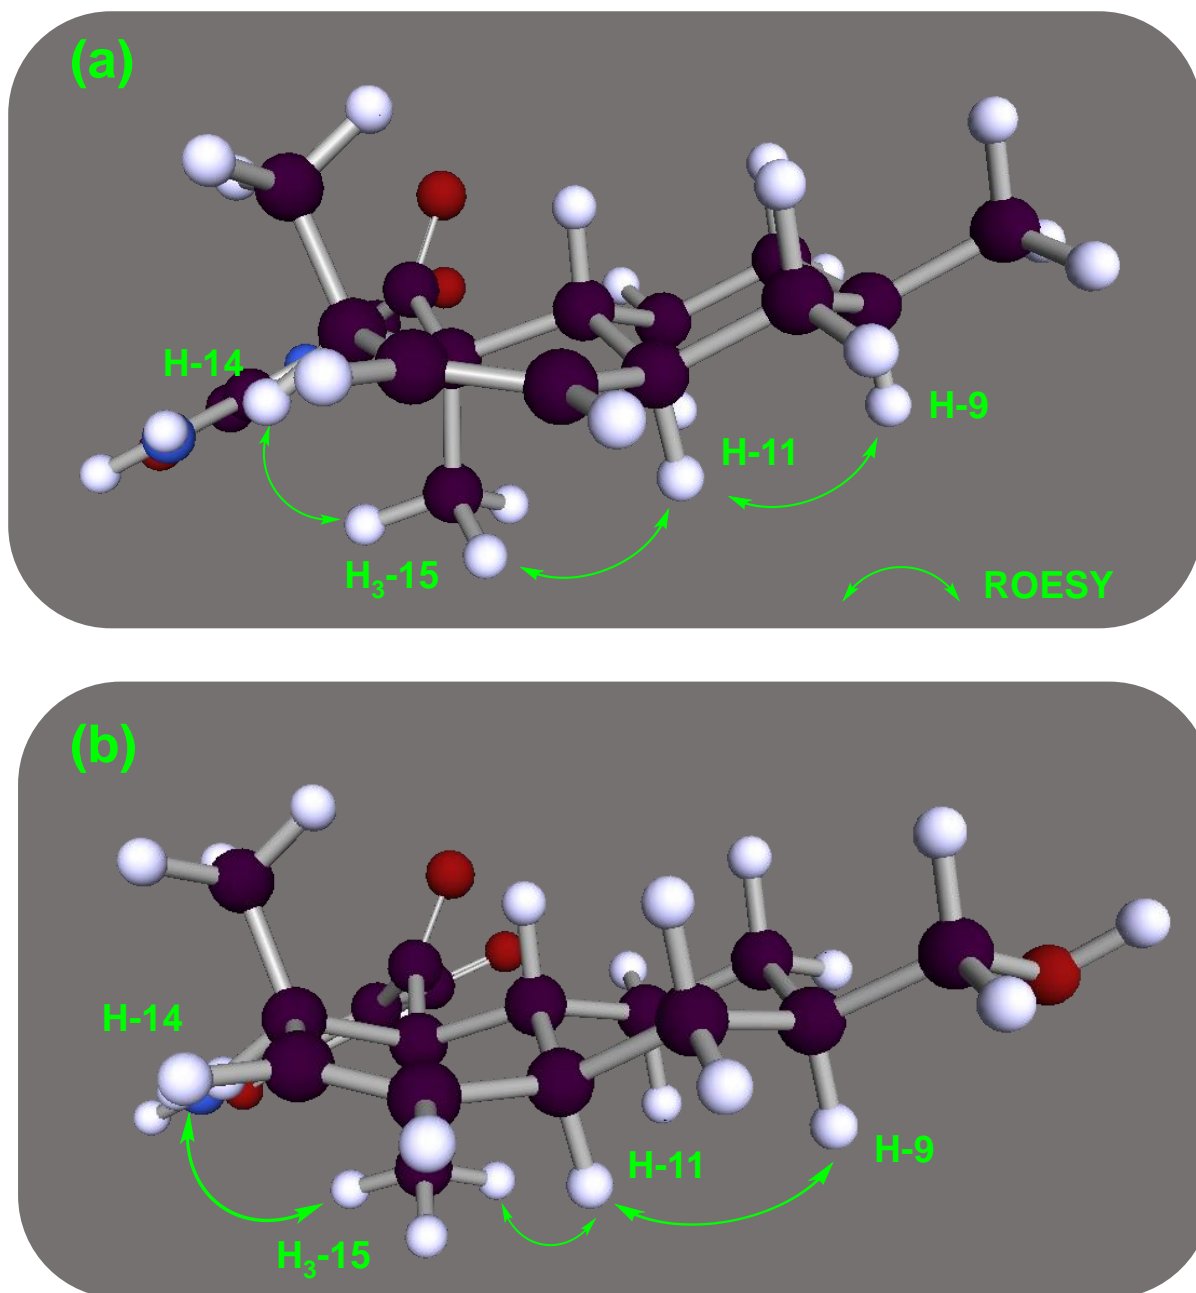

**Figure S18.** LC/MS traces (ion counts) of ion extraction for the ion  $[M-H]^-$  at  $m/z$  331 (ligiamycin B) (a) in a pure culture of *Streptomyces* sp. GET02.ST, (b) in a pure culture of *Achromobacter* sp. GET02.AC, and (c) in a co-culture. The LC/MS analyses were acquired with 10%–100% aqueous  $CH_3CN$  over 20 min.

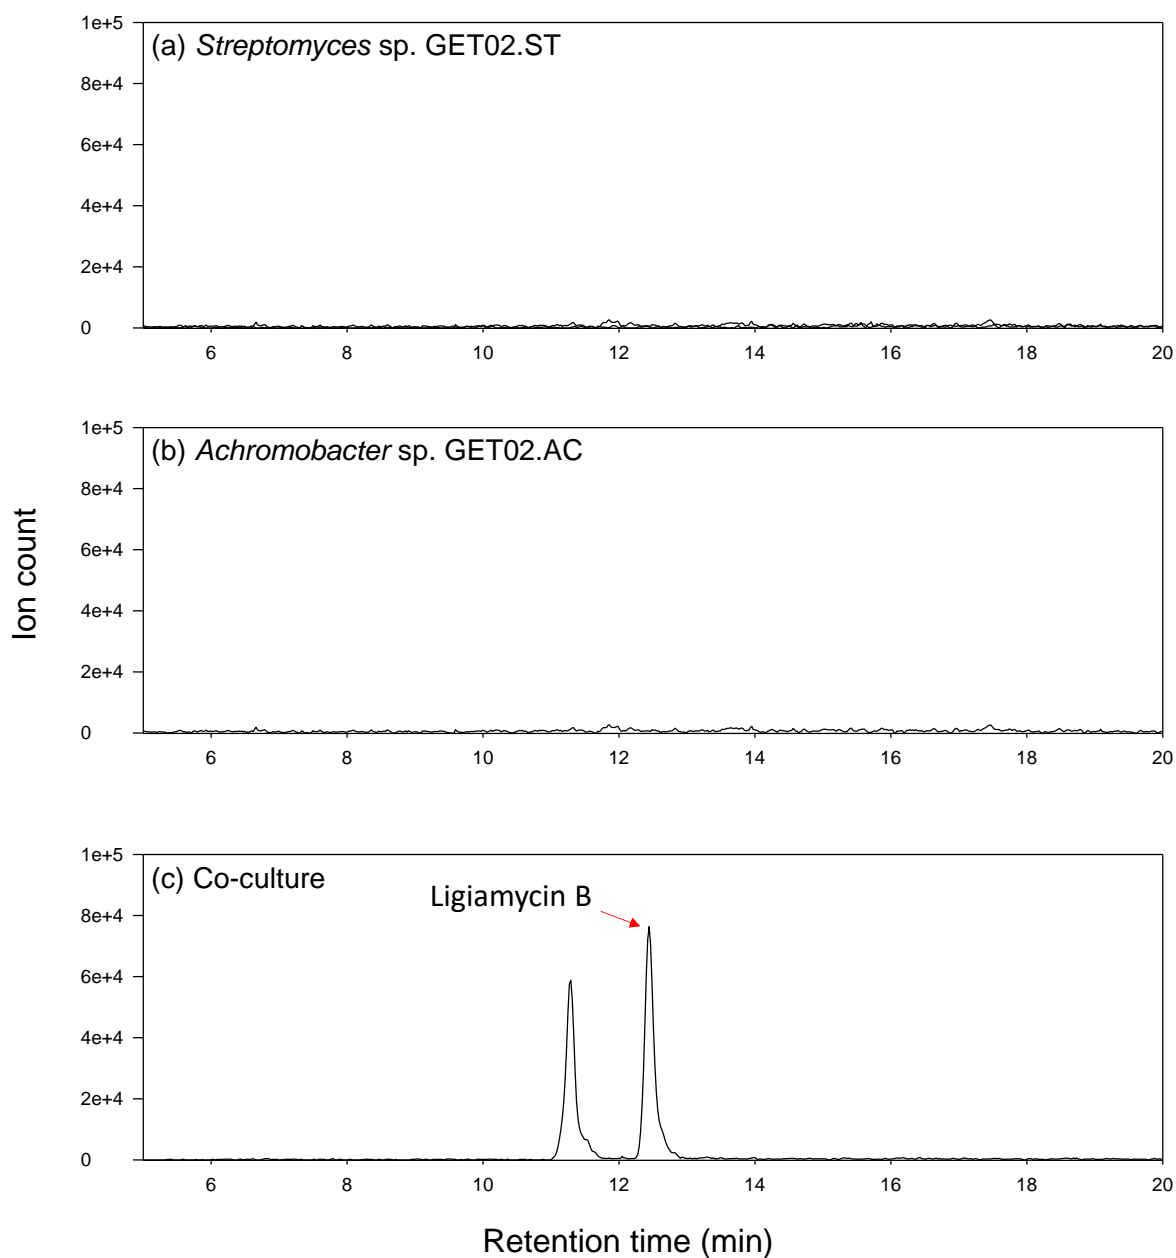

**Table S2.** Cartesian coordinates of ligiamycins A (1) and B (2).

(a) Cartesian coordinates of ligiamycin A (1).

| No. | atom | Cartesian coordinates |            |            |
|-----|------|-----------------------|------------|------------|
| 1   | c    | 10.747191             | 1.99314333 | 5.74239902 |
| 2   | c    | 12.7030904            | 0.52106201 | 4.02962159 |
| 3   | c    | 11.5527494            | -1.8272648 | 2.86988688 |
| 4   | c    | 9.07494476            | -2.3089731 | 2.72552631 |
| 5   | c    | 7.08213678            | -0.5719276 | 3.76559416 |
| 6   | c    | 8.13517566            | 2.08515419 | 4.35128977 |
| 7   | h    | 12.9047248            | -3.1799318 | 2.06294629 |
| 8   | h    | 8.42951044            | -4.0689011 | 1.83408814 |
| 9   | c    | 4.75572025            | -0.3636018 | 2.0215213  |
| 10  | h    | 6.38793542            | -1.4154177 | 5.55931328 |
| 11  | c    | 2.6515444             | 1.273216   | 3.18698917 |
| 12  | h    | 5.34563144            | 0.4557426  | 0.18627568 |
| 13  | h    | 4.01645079            | -2.2769784 | 1.60782494 |
| 14  | c    | 6.06110569            | 3.64872429 | 5.67496596 |
| 15  | h    | 8.50145546            | 3.01794177 | 2.52055507 |
| 16  | c    | 0.37764667            | 1.53001013 | 1.41219967 |
| 17  | h    | 0.91737487            | 2.49388929 | -0.3638737 |
| 18  | h    | -0.4096598            | -0.3380548 | 0.90398064 |
| 19  | h    | -1.151038             | 2.64656724 | 2.29682578 |
| 20  | c    | 10.5260226            | 0.64267948 | 8.31680471 |
| 21  | h    | 9.87971043            | -1.323049  | 8.06507838 |
| 22  | h    | 12.3544908            | 0.56041396 | 9.31078282 |
| 23  | h    | 9.17738222            | 1.60825586 | 9.57944162 |
| 24  | c    | 14.0102437            | 2.09955363 | 1.95088888 |
| 25  | h    | 14.2267381            | -0.1635401 | 5.30141532 |
| 26  | h    | 12.6174657            | 3.01922786 | 0.70400351 |
| 27  | h    | 15.2276097            | 3.59747769 | 2.7413728  |
| 28  | h    | 15.2070003            | 0.86007313 | 0.77049203 |
| 29  | c    | 3.70571075            | 3.86299055 | 3.99060868 |
| 30  | h    | 2.00211858            | 0.29626315 | 4.92478277 |
| 31  | h    | 5.52495454            | 2.73742045 | 7.4809683  |
| 32  | h    | 6.75073627            | 5.55771734 | 6.13600324 |
| 33  | h    | 4.19412793            | 4.9638157  | 2.27656381 |
| 34  | h    | 2.22135649            | 4.95018926 | 4.98313256 |
| 35  | c    | 11.6606426            | 4.76862079 | 6.06147826 |
| 36  | c    | 13.1643628            | 5.58774984 | 8.30820437 |
| 37  | o    | 11.090653             | 6.36132775 | 4.50890435 |
| 38  | c    | 12.5241215            | 8.01456227 | 9.59782512 |
| 39  | n    | 14.4230566            | 8.41163014 | 11.4630844 |
| 40  | c    | 16.1661521            | 6.50353642 | 11.4800426 |
| 41  | c    | 15.3348643            | 4.69406929 | 9.40135746 |
| 42  | o    | 18.0044816            | 6.22267483 | 12.8136178 |
| 43  | o    | 10.7576825            | 9.41547212 | 9.29269867 |
| 44  | h    | 14.4034461            | 9.8897984  | 12.6834271 |
| 45  | n    | 16.8509791            | 2.69006851 | 9.04211366 |
| 46  | h    | 18.4199617            | 2.57071403 | 10.1472989 |
| 47  | h    | 16.5628832            | 1.4056492  | 7.65274903 |

(b) Cartesian coordinates of *ent*-ligiamycin A (1).

| No. | atom | Cartesian coordinates |              |              |
|-----|------|-----------------------|--------------|--------------|
| 1   | c    | -10.74782077          | 1.992968616  | 5.741281992  |
| 2   | c    | -12.70423105          | 0.519910931  | 4.029048342  |
| 3   | c    | -11.55292464          | -1.825334103 | 2.863841968  |
| 4   | c    | -9.075156001          | -2.306912236 | 2.719687814  |
| 5   | c    | -7.082271121          | -0.571751059 | 3.763619661  |
| 6   | c    | -8.134779583          | 2.085293385  | 4.350496694  |
| 7   | h    | -12.90456457          | -3.176442592 | 2.054107926  |
| 8   | h    | -8.429599934          | -4.064621239 | 1.82435326   |
| 9   | c    | -4.75415717           | -0.363106212 | 2.021538417  |
| 10  | h    | -6.390632663          | -1.417516232 | 5.556938631  |
| 11  | c    | -2.649426828          | 1.271559131  | 3.189569221  |
| 12  | h    | -5.341758027          | 0.45784891   | 0.186791657  |
| 13  | h    | -4.01551296           | -2.27652404  | 1.608296033  |
| 14  | c    | -6.060482954          | 3.646888482  | 5.676779602  |
| 15  | h    | -8.500627412          | 3.01947312   | 2.520735751  |
| 16  | c    | -0.375579292          | 1.53007731   | 1.414284525  |
| 17  | h    | -0.91549907           | 2.497279432  | -0.359507025 |
| 18  | h    | 0.409977825           | -0.337556912 | 0.903034527  |
| 19  | h    | 1.153587352           | 2.643896125  | 2.300779899  |
| 20  | c    | -10.52668505          | 0.641703992  | 8.315604972  |
| 21  | h    | -9.887443349          | -1.325689364 | 8.061526566  |
| 22  | h    | -12.3534861           | 0.565109466  | 9.312364908  |
| 23  | h    | -9.172517084          | 1.602426241  | 9.575360643  |
| 24  | c    | -14.01853023          | 2.098866773  | 1.954757462  |
| 25  | h    | -14.22385718          | -0.168998132 | 5.303049465  |
| 26  | h    | -12.63016678          | 3.026829426  | 0.709824562  |
| 27  | h    | -15.24154581          | 3.589300441  | 2.749953505  |
| 28  | h    | -15.21089983          | 0.857351124  | 0.772604165  |
| 29  | c    | -3.702706986          | 3.861116359  | 3.995261751  |
| 30  | h    | -1.999674063          | 0.292589455  | 4.925683624  |
| 31  | h    | -5.526837411          | 2.7345429    | 7.482538264  |
| 32  | h    | -6.749233288          | 5.556207086  | 6.136907106  |
| 33  | h    | -4.187588542          | 4.964611664  | 2.282459261  |
| 34  | h    | -2.219064262          | 4.944788224  | 4.992224877  |
| 35  | c    | -11.66168074          | 4.768923638  | 6.058981366  |
| 36  | c    | -13.16513515          | 5.590390156  | 8.305065129  |
| 37  | o    | -11.0909392           | 6.360506088  | 4.505228561  |
| 38  | c    | -12.52896332          | 8.021230912  | 9.589096287  |
| 39  | n    | -14.42570976          | 8.417060813  | 11.45677919  |
| 40  | c    | -16.16433152          | 6.505097798  | 11.4797315   |
| 41  | c    | -15.33179623          | 4.693706105  | 9.403530549  |
| 42  | o    | -18.00012807          | 6.222549111  | 12.81641419  |
| 43  | o    | -10.76648244          | 9.426194785  | 9.278539594  |
| 44  | h    | -14.40785942          | 9.897888417  | 12.67390188  |
| 45  | n    | -16.84272672          | 2.684961764  | 9.050505295  |
| 46  | h    | -18.41034673          | 2.564578054  | 10.15761278  |
| 47  | h    | -16.55504027          | 1.400110208  | 7.661317825  |

(c) Cartesian coordinates of ligiamycin B (2).

| No. | atom | Cartesian coordinates |              |              |
|-----|------|-----------------------|--------------|--------------|
| 1   | c    | 10.75807943           | 1.983009671  | 5.725254648  |
| 2   | c    | 12.7331079            | 0.502140684  | 4.042143753  |
| 3   | c    | 11.59641083           | -1.852929393 | 2.883186898  |
| 4   | c    | 9.120490853           | -2.334761778 | 2.712044759  |
| 5   | c    | 7.116294463           | -0.592417257 | 3.720845881  |
| 6   | c    | 8.160640554           | 2.068814771  | 4.306720256  |
| 7   | h    | 12.95732103           | -3.211188852 | 2.101121171  |
| 8   | h    | 8.485150847           | -4.099976101 | 1.823637485  |
| 9   | c    | 4.808960474           | -0.398627823 | 1.949476916  |
| 10  | h    | 6.400623161           | -1.426724808 | 5.509818571  |
| 11  | c    | 2.703297161           | 1.240509476  | 3.100613378  |
| 12  | h    | 5.420969939           | 0.412042824  | 0.117772926  |
| 13  | h    | 4.081289941           | -2.317653318 | 1.541481711  |
| 14  | c    | 6.069868981           | 3.636208798  | 5.601078438  |
| 15  | h    | 8.546115692           | 2.994501617  | 2.476216363  |
| 16  | c    | 0.444475193           | 1.453372766  | 1.318572174  |
| 17  | h    | 1.027545213           | 2.48469895   | -0.418903562 |
| 18  | h    | -0.156112126          | -0.471878486 | 0.724561999  |
| 19  | o    | -1.54092207           | 2.72723682   | 2.581593788  |
| 20  | c    | 10.50839127           | 0.647571891  | 8.30478839   |
| 21  | h    | 9.863820083           | -1.31938893  | 8.057941969  |
| 22  | h    | 12.32553536           | 0.570234249  | 9.319505202  |
| 23  | h    | 9.146009151           | 1.620939167  | 9.546268416  |
| 24  | c    | 14.06185313           | 2.068348539  | 1.967770764  |
| 25  | h    | 14.24338648           | -0.174602857 | 5.333792207  |
| 26  | h    | 12.68198447           | 2.979679367  | 0.700576231  |
| 27  | h    | 15.26985149           | 3.571680481  | 2.761995842  |
| 28  | h    | 15.27178225           | 0.82219267   | 0.807935034  |
| 29  | c    | 3.732415429           | 3.841370225  | 3.892400854  |
| 30  | h    | 2.009562598           | 0.273479833  | 4.824456065  |
| 31  | h    | 5.516137995           | 2.734571159  | 7.406342739  |
| 32  | h    | 6.752648144           | 5.548529211  | 6.059131852  |
| 33  | h    | 4.242609375           | 4.923645446  | 2.171905468  |
| 34  | h    | 2.224227272           | 4.918068774  | 4.846353488  |
| 35  | c    | 11.66905394           | 4.760257404  | 6.037179698  |
| 36  | c    | 13.14808746           | 5.593630787  | 8.295018996  |
| 37  | o    | 11.11952022           | 6.342362924  | 4.466389748  |
| 38  | c    | 12.49967724           | 8.03323621   | 9.556461661  |
| 39  | n    | 14.37564446           | 8.439261615  | 11.44288181  |
| 40  | c    | 16.11258772           | 6.526747078  | 11.49672368  |
| 41  | c    | 15.3025741            | 4.703312964  | 9.422030656  |
| 42  | o    | 17.93316023           | 6.251141086  | 12.85564628  |
| 43  | o    | 10.74285391           | 9.438199062  | 9.216530678  |
| 44  | h    | 14.34349027           | 9.925741905  | 12.65272332  |
| 45  | n    | 16.81888636           | 2.693715171  | 9.097325001  |
| 46  | h    | 18.37179954           | 2.578062111  | 10.22520485  |
| 47  | h    | 16.54314587           | 1.396458038  | 7.717629474  |
| 48  | h    | -2.906916847          | 3.020370521  | 1.394554553  |



(d) Cartesian coordinates of *ent*-ligiamycin B (2).

| No. | atom | Cartesian coordinates |              |              |
|-----|------|-----------------------|--------------|--------------|
| 1   | c    | 10.75807943           | 1.983009671  | 5.725254648  |
| 2   | c    | 12.7331079            | 0.502140684  | 4.042143753  |
| 3   | c    | 11.59641083           | -1.852929393 | 2.883186898  |
| 4   | c    | 9.120490853           | -2.334761778 | 2.712044759  |
| 5   | c    | 7.116294463           | -0.592417257 | 3.720845881  |
| 6   | c    | 8.160640554           | 2.068814771  | 4.306720256  |
| 7   | h    | 12.95732103           | -3.211188852 | 2.101121171  |
| 8   | h    | 8.485150847           | -4.099976101 | 1.823637485  |
| 9   | c    | 4.808960474           | -0.398627823 | 1.949476916  |
| 10  | h    | 6.400623161           | -1.426724808 | 5.509818571  |
| 11  | c    | 2.703297161           | 1.240509476  | 3.100613378  |
| 12  | h    | 5.420969939           | 0.412042824  | 0.117772926  |
| 13  | h    | 4.081289941           | -2.317653318 | 1.541481711  |
| 14  | c    | 6.069868981           | 3.636208798  | 5.601078438  |
| 15  | h    | 8.546115692           | 2.994501617  | 2.476216363  |
| 16  | c    | 0.444475193           | 1.453372766  | 1.318572174  |
| 17  | h    | 1.027545213           | 2.48469895   | -0.418903562 |
| 18  | h    | -0.156112126          | -0.471878486 | 0.724561999  |
| 19  | o    | -1.54092207           | 2.72723682   | 2.581593788  |
| 20  | c    | 10.50839127           | 0.647571891  | 8.30478839   |
| 21  | h    | 9.863820083           | -1.31938893  | 8.057941969  |
| 22  | h    | 12.32553536           | 0.570234249  | 9.319505202  |
| 23  | h    | 9.146009151           | 1.620939167  | 9.546268416  |
| 24  | c    | 14.06185313           | 2.068348539  | 1.967770764  |
| 25  | h    | 14.24338648           | -0.174602857 | 5.333792207  |
| 26  | h    | 12.68198447           | 2.979679367  | 0.700576231  |
| 27  | h    | 15.26985149           | 3.571680481  | 2.761995842  |
| 28  | h    | 15.27178225           | 0.82219267   | 0.807935034  |
| 29  | c    | 3.732415429           | 3.841370225  | 3.892400854  |
| 30  | h    | 2.009562598           | 0.273479833  | 4.824456065  |
| 31  | h    | 5.516137995           | 2.734571159  | 7.406342739  |
| 32  | h    | 6.752648144           | 5.548529211  | 6.059131852  |
| 33  | h    | 4.242609375           | 4.923645446  | 2.171905468  |
| 34  | h    | 2.224227272           | 4.918068774  | 4.846353488  |
| 35  | c    | 11.66905394           | 4.760257404  | 6.037179698  |
| 36  | c    | 13.14808746           | 5.593630787  | 8.295018996  |
| 37  | o    | 11.11952022           | 6.342362924  | 4.466389748  |
| 38  | c    | 12.49967724           | 8.03323621   | 9.556461661  |
| 39  | n    | 14.37564446           | 8.439261615  | 11.44288181  |
| 40  | c    | 16.11258772           | 6.526747078  | 11.49672368  |
| 41  | c    | 15.3025741            | 4.703312964  | 9.422030656  |
| 42  | o    | 17.93316023           | 6.251141086  | 12.85564628  |
| 43  | o    | 10.74285391           | 9.438199062  | 9.216530678  |
| 44  | h    | 14.34349027           | 9.925741905  | 12.65272332  |
| 45  | n    | 16.81888636           | 2.693715171  | 9.097325001  |
| 46  | h    | 18.37179954           | 2.578062111  | 10.22520485  |
| 47  | h    | 16.54314587           | 1.396458038  | 7.717629474  |
| 48  | h    | 2.906917327           | 3.020369165  | 1.394553599  |

**Table S3.** ECD calculations of ligiamycins A (1) and B (2).

(a) ECD calculations of ligiamycin A (1).

total energy = -1034.1216

kinetic energy = 1024.30205

potential energy = -2058.4236

Parameters of Level DFT

DFT settings (Functional B3LYP / Gridsize M3)

Geometry optimization options (Energy  $10^{-6}$  Hartree, Gradient norm | dE / dxyz | =  $10^{-3}$  Hartree/Bohr)

Energy minimized coordinates of ent.-donghaesulfin A at the basis set def2-TVZPP for all atoms (Å).

| atomic coordinates |          |          | atom | charge |
|--------------------|----------|----------|------|--------|
| 10.74748           | 1.993091 | 5.742177 | c    | 6      |
| 12.70324           | 0.520975 | 4.029264 | c    | 6      |
| 11.55283           | -1.82752 | 2.869964 | c    | 6      |
| 9.07499            | -2.30907 | 2.725659 | c    | 6      |
| 7.082228           | -0.57168 | 3.765261 | c    | 6      |
| 8.1354             | 2.085305 | 4.351122 | c    | 6      |
| 12.90474           | -3.18041 | 2.063312 | h    | 1      |
| 8.42947            | -4.06918 | 1.834638 | h    | 1      |
| 4.755873           | -0.36309 | 2.021141 | c    | 6      |
| 6.387742           | -1.415   | 5.558948 | h    | 1      |
| 2.651623           | 1.273173 | 3.187232 | c    | 6      |
| 5.345732           | 0.456912 | 0.186167 | h    | 1      |
| 4.016772           | -2.2764  | 1.60685  | h    | 1      |
| 6.061362           | 3.649084 | 5.674628 | c    | 6      |
| 8.501782           | 3.018072 | 2.520388 | h    | 1      |
| 0.377367           | 1.5298   | 1.412878 | c    | 6      |
| 0.916603           | 2.494027 | -0.36316 | h    | 1      |
| -0.40968           | -0.33834 | 0.904539 | h    | 1      |
| -1.15137           | 2.645953 | 2.297927 | h    | 1      |
| 10.5263            | 0.642531 | 8.316544 | c    | 6      |
| 9.87976            | -1.3231  | 8.064764 | h    | 1      |
| 12.3548            | 0.56001  | 9.310407 | h    | 1      |
| 9.177843           | 1.60819  | 9.579302 | h    | 1      |
| 14.0101            | 2.09925  | 1.950197 | c    | 6      |
| 14.22707           | -0.16342 | 5.30094  | h    | 1      |
| 12.61715           | 3.018726 | 0.703353 | h    | 1      |
| 15.22754           | 3.597292 | 2.740328 | h    | 1      |
| 15.20673           | 0.859638 | 0.769811 | h    | 1      |
| 3.705657           | 3.863056 | 3.990653 | c    | 6      |
| 2.002742           | 0.295992 | 4.925106 | h    | 1      |
| 5.525498           | 2.73818  | 7.48092  | h    | 1      |
| 6.751008           | 5.558195 | 6.135179 | h    | 1      |
| 4.193633           | 4.963952 | 2.276517 | h    | 1      |
| 2.221344           | 4.950078 | 4.983441 | h    | 1      |
| 11.66112           | 4.768497 | 6.061266 | c    | 6      |
| 13.16448           | 5.587743 | 8.308205 | c    | 6      |
| 11.09158           | 6.361131 | 4.508416 | o    | 8      |

|          |          |          |   |   |
|----------|----------|----------|---|---|
| 12.524   | 8.014522 | 9.597739 | c | 6 |
| 14.42246 | 8.41155  | 11.46344 | n | 7 |
| 16.16582 | 6.503761 | 11.48034 | c | 6 |
| 15.33476 | 4.694109 | 9.401758 | c | 6 |
| 18.00434 | 6.223311 | 12.81374 | o | 8 |
| 10.75764 | 9.415529 | 9.292174 | o | 8 |
| 14.40237 | 9.889458 | 12.68406 | h | 1 |
| 16.85065 | 2.689943 | 9.043098 | n | 7 |
| 18.41941 | 2.57057  | 10.14854 | h | 1 |
| 16.56265 | 1.405372 | 7.653894 | h | 1 |

(b) ECD calculations of *ent*-ligiamycin A (1).

total energy = -1034.1249

kinetic energy = 1024.30943

potential energy = -2058.4343

Parameters of Level DFT

DFT settings (Functional B3LYP / Gridsize M3)

Geometry optimization options (Energy  $10^{-6}$  Hartree, Gradient norm | dE / dxyz | =  $10^{-3}$  Hartree/Bohr)

Energy minimized coordinates of *ent*.-donghaesulfin A at the basis set def2-TVZPP for all atoms (Å).

| atomic coordinates |             |             | atom | charge |
|--------------------|-------------|-------------|------|--------|
| -10.74763518       | 1.99302684  | 5.7415065   | c    | 6      |
| -12.70417649       | 0.52004045  | 4.02935204  | c    | 6      |
| -11.55301122       | -1.82518565 | 2.8639768   | c    | 6      |
| -9.07527064        | -2.30684428 | 2.71964991  | c    | 6      |
| -7.08225753        | -0.57179715 | 3.76351562  | c    | 6      |
| -8.13460787        | 2.08523948  | 4.35070619  | c    | 6      |
| -12.9047504        | -3.17621885 | 2.05428112  | h    | 1      |
| -8.42983514        | -4.06456191 | 1.82424357  | h    | 1      |
| -4.75426033        | -0.36307672 | 2.02128353  | c    | 6      |
| -6.39049255        | -1.41770916 | 5.5567172   | h    | 1      |
| -2.64936248        | 1.27135221  | 3.18934535  | c    | 6      |
| -5.3419547         | 0.4581187   | 0.18667398  | h    | 1      |
| -4.0157486         | -2.27648646 | 1.6077679   | h    | 1      |
| -6.06016272        | 3.64663737  | 5.67698983  | c    | 6      |
| -8.50044989        | 3.01958681  | 2.52102939  | h    | 1      |
| -0.37560819        | 1.52992843  | 1.41394775  | c    | 6      |
| -0.91557572        | 2.4973836   | -0.35969053 | h    | 1      |
| 0.40978932         | -0.33769628 | 0.90241817  | h    | 1      |
| 1.1536922          | 2.64353447  | 2.30047901  | h    | 1      |
| -10.52648889       | 0.6417964   | 8.31584514  | c    | 6      |
| -9.88734272        | -1.32563119 | 8.06177811  | h    | 1      |
| -12.35325879       | 0.56530294  | 9.31266252  | h    | 1      |
| -9.17223732        | 1.60247431  | 9.57554218  | h    | 1      |
| -14.01854856       | 2.09912398  | 1.95520292  | c    | 6      |
| -14.22374241       | -0.16889368 | 5.3034123   | h    | 1      |
| -12.63022997       | 3.02739022  | 0.71044776  | h    | 1      |
| -15.24172946       | 3.58934208  | 2.75055348  | h    | 1      |

|              |            |             |   |   |
|--------------|------------|-------------|---|---|
| -15.21076231 | 0.85765676 | 0.77284408  | h | 1 |
| -3.70243445  | 3.86087792 | 3.99541188  | c | 6 |
| -1.99954975  | 0.29215396 | 4.92530704  | h | 1 |
| -5.52648651  | 2.73413869 | 7.4826613   | h | 1 |
| -6.74880375  | 5.55595542 | 6.1372874   | h | 1 |
| -4.187297    | 4.96462656 | 2.28276802  | h | 1 |
| -2.21867317  | 4.94431836 | 4.99245014  | h | 1 |
| -11.66136655 | 4.76903758 | 6.0591666   | c | 6 |
| -13.1652415  | 5.59053359 | 8.3049521   | c | 6 |
| -11.09017018 | 6.36065317 | 4.50560901  | o | 8 |
| -12.52963707 | 8.02165788 | 9.58873849  | c | 6 |
| -14.42648556 | 8.41724852 | 11.45637247 | n | 7 |
| -16.16481193 | 6.50502011 | 11.47934752 | c | 6 |
| -15.33187751 | 4.69362925 | 9.4033017   | c | 6 |
| -18.00063122 | 6.22225967 | 12.81594943 | o | 8 |
| -10.76750924 | 9.42702934 | 9.27801922  | o | 8 |
| -14.40874006 | 9.8979727  | 12.67362027 | h | 1 |
| -16.84249741 | 2.68466145 | 9.05032746  | n | 7 |
| -18.4101177  | 2.56408793 | 10.15740904 | h | 1 |
| -16.55448529 | 1.39968848 | 7.66132321  | h | 1 |

(c) ECD calculations of ligiamycin B (2).

total energy = -1109.2367

kinetic energy = 1099.05832

potential energy = -2208.2951

Parameters of Level DFT

DFT settings (Functional B3LYP / Gridsize M3)

Geometry optimization options (Energy  $10^{-6}$  Hartree, Gradient norm  $|dE/dxyz| = 10^{-3}$  Hartree/Bohr)

Energy minimized coordinates of ent.-donghaesulfin A at the basis set def2-TVZPP for all atoms (Å).

| atomic coordinates |             |             | atom | charge |
|--------------------|-------------|-------------|------|--------|
| 10.7579982         | 1.98374977  | 5.72483457  | c    | 6      |
| 12.73321401        | 0.50293749  | 4.04180113  | c    | 6      |
| 11.59672391        | -1.85202557 | 2.88243125  | c    | 6      |
| 9.12084058         | -2.33410517 | 2.71144632  | c    | 6      |
| 7.11656679         | -0.59206392 | 3.72061422  | c    | 6      |
| 8.16047192         | 2.06932095  | 4.30639752  | c    | 6      |
| 12.95770294        | -3.20974221 | 2.09951624  | h    | 1      |
| 8.4856165          | -4.09942252 | 1.82315732  | h    | 1      |
| 4.80866918         | -0.39947562 | 1.94995369  | c    | 6      |
| 6.40161291         | -1.42653776 | 5.5098038   | h    | 1      |
| 2.70303088         | 1.24004892  | 3.10048793  | c    | 6      |
| 5.42012378         | 0.41027638  | 0.11764556  | h    | 1      |
| 4.08114213         | -2.31879967 | 1.54313637  | h    | 1      |
| 6.06953466         | 3.63654444  | 5.60061358  | c    | 6      |
| 8.54581997         | 2.99497977  | 2.47585735  | h    | 1      |
| 0.44400046         | 1.45243091  | 1.3186773   | c    | 6      |
| 1.02665795         | 2.4834544   | -0.41911109 | h    | 1      |

|             |             |             |   |   |
|-------------|-------------|-------------|---|---|
| -0.15664479 | -0.47297157 | 0.72520828  | h | 1 |
| -1.54121997 | 2.72643529  | 2.58187368  | o | 8 |
| 10.5081278  | 0.64798505  | 8.30417521  | c | 6 |
| 9.86355101  | -1.31894305 | 8.05700415  | h | 1 |
| 12.32517417 | 0.57047507  | 9.31906531  | h | 1 |
| 9.14563683  | 1.6212019   | 9.54567112  | h | 1 |
| 14.06263844 | 2.0692073   | 1.96786799  | c | 6 |
| 14.2432519  | -0.17402456 | 5.33363676  | h | 1 |
| 12.68316349 | 2.9808029   | 0.70044173  | h | 1 |
| 15.27063329 | 3.57230858  | 2.76252495  | h | 1 |
| 15.27269039 | 0.82300743  | 0.80819903  | h | 1 |
| 3.7318836   | 3.84109164  | 3.89211691  | c | 6 |
| 2.00932232  | 0.27328583  | 4.82452116  | h | 1 |
| 5.51603363  | 2.73495179  | 7.40599162  | h | 1 |
| 6.75202435  | 5.54900532  | 6.05846712  | h | 1 |
| 4.24197981  | 4.92309974  | 2.17140789  | h | 1 |
| 2.22360854  | 4.91782482  | 4.84587528  | h | 1 |
| 11.66915256 | 4.76097593  | 6.03733317  | c | 6 |
| 13.14808517 | 5.59370614  | 8.29553788  | c | 6 |
| 11.11959598 | 6.34346777  | 4.46700668  | o | 8 |
| 12.50063698 | 8.03382756  | 9.556651    | c | 6 |
| 14.37733725 | 8.43971698  | 11.44248941 | n | 7 |
| 16.11358723 | 6.5265263   | 11.49658229 | c | 6 |
| 15.30225461 | 4.70268975  | 9.42273177  | c | 6 |
| 17.93455533 | 6.25077959  | 12.85493121 | o | 8 |
| 10.7442729  | 9.43929076  | 9.21682785  | o | 8 |
| 14.34623027 | 9.92679307  | 12.65165419 | h | 1 |
| 16.81707455 | 2.69175427  | 9.09921531  | n | 7 |
| 18.36995058 | 2.57569523  | 10.22713836 | h | 1 |
| 16.54022993 | 1.39373929  | 7.72043106  | h | 1 |
| -2.90715847 | 3.01991793  | 1.39486104  | h | 1 |

(d) ECD calculations of *ent*-ligiamycin B (**2**).

total energy = -1109.2367

kinetic energy = 1099.05832

potential energy = -2208.2951

Parameters of Level DFT

DFT settings (Functional B3LYP / Gridsize M3)

Geometry optimization options (Energy  $10^{-6}$  Hartree, Gradient norm | dE / dxyz | =  $10^{-3}$  Hartree/Bohr)

Energy minimized coordinates of *ent*.-donghaesulfin A at the basis set def2-TVZPP for all atoms (Å).

| atomic coordinates |             |            | atom | charge |
|--------------------|-------------|------------|------|--------|
| -10.7579982        | 1.98374971  | 5.72483525 | c    | 6      |
| -12.73321429       | 0.50293657  | 4.04180276 | c    | 6      |
| -11.59672409       | -1.85202856 | 2.88243692 | c    | 6      |
| -9.12084057        | -2.33410658 | 2.71144979 | c    | 6      |
| -7.11656671        | -0.59206289 | 3.72061341 | c    | 6      |
| -8.16047243        | 2.06932158  | 4.30639741 | c    | 6      |

|              |             |             |   |   |
|--------------|-------------|-------------|---|---|
| -12.95770305 | -3.20974758 | 2.09952588  | h | 1 |
| -8.48561627  | -4.09942505 | 1.82316308  | h | 1 |
| -4.80867161  | -0.39947232 | 1.94994994  | c | 6 |
| -6.40160938  | -1.42653553 | 5.50980213  | h | 1 |
| -2.70303172  | 1.24004871  | 3.10048588  | c | 6 |
| -5.42012795  | 0.41028385  | 0.11764428  | h | 1 |
| -4.08114558  | -2.31879574 | 1.54312779  | h | 1 |
| -6.06953524  | 3.63654519  | 5.60061365  | c | 6 |
| -8.54582116  | 2.99498065  | 2.47585755  | h | 1 |
| -0.44400163  | 1.45243239  | 1.31867503  | c | 6 |
| -1.02665808  | 2.48346213  | -0.41910999 | h | 1 |
| 0.15664022   | -0.47296927 | 0.72519996  | h | 1 |
| 1.54122133   | 2.72642973  | 2.58187452  | o | 8 |
| -10.50812698 | 0.64798611  | 8.30417642  | c | 6 |
| -9.86355092  | -1.31894232 | 8.05700606  | h | 1 |
| -12.32517316 | 0.57047725  | 9.31906713  | h | 1 |
| -9.14563533  | 1.62120318  | 9.5456715   | h | 1 |
| -14.06263509 | 2.06920425  | 1.96786562  | c | 6 |
| -14.24325389 | -0.17402252 | 5.333638    | h | 1 |
| -12.68315794 | 2.98079646  | 0.70043933  | h | 1 |
| -15.27062939 | 3.57230797  | 2.76251882  | h | 1 |
| -15.27268695 | 0.82300361  | 0.80819737  | h | 1 |
| -3.73188186  | 3.84109098  | 3.89211982  | c | 6 |
| -2.00932324  | 0.27328175  | 4.82451695  | h | 1 |
| -5.51603662  | 2.7349538   | 7.40599308  | h | 1 |
| -6.7520245   | 5.54900672  | 6.058465    | h | 1 |
| -4.24197423  | 4.92310342  | 2.17141239  | h | 1 |
| -2.22360614  | 4.91781992  | 4.84588195  | h | 1 |
| -11.66915305 | 4.76097565  | 6.0373333   | c | 6 |
| -13.14808549 | 5.59370533  | 8.29553833  | c | 6 |
| -11.11959659 | 6.34346753  | 4.46700699  | o | 8 |
| -12.50063594 | 8.033826    | 9.5566522   | c | 6 |
| -14.37733617 | 8.43971565  | 11.44249073 | n | 7 |
| -16.11358793 | 6.52652638  | 11.4965821  | c | 6 |
| -15.30225606 | 4.70269008  | 9.42273095  | c | 6 |
| -17.934557   | 6.25078094  | 12.85492995 | o | 8 |
| -10.74427144 | 9.43928851  | 9.21682911  | o | 8 |
| -14.34622833 | 9.92679114  | 12.65165628 | h | 1 |
| -16.8170776  | 2.69175594  | 9.09921278  | n | 7 |
| -18.36995416 | 2.57569747  | 10.22713525 | h | 1 |
| -16.5402333  | 1.39374142  | 7.72042793  | h | 1 |
| 2.90715925   | 3.01991506  | 1.39486189  | h | 1 |

**Figure S19.** Comparison of the experimental ECD data of ligiamycin A (**1**) with the calculated ECD data; black line: experimental ECD data; blue dotted line: calculated ECD data (5*S*, 6*S*, 9*S*, 11*R*, and 14*S*); red dotted line: calculated ECD data (5*R*, 6*R*, 9*R*, 11*S*, and 14*R*).

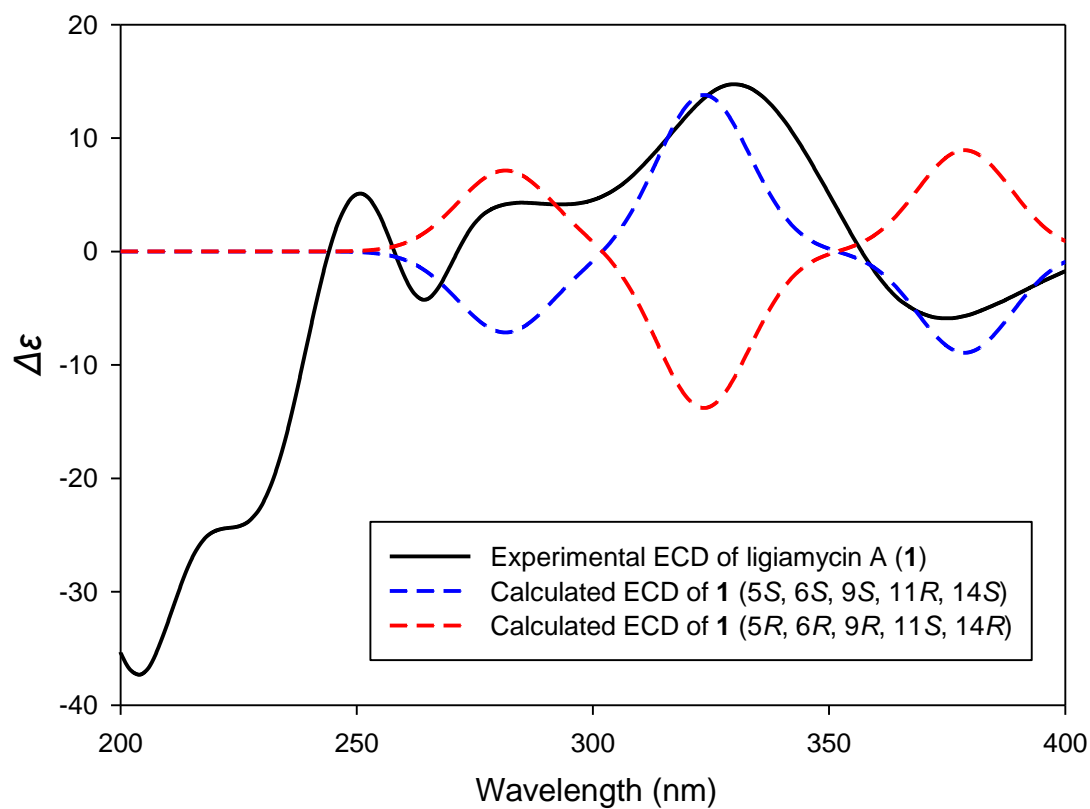

**Figure S20.** Comparison of the experimental ECD data of ligiamycin B (**2**) with the calculated ECD data; black line: experimental ECD data; blue dotted line: calculated ECD data (5*S*, 6*S*, 9*S*, 11*R*, 14*S*); red dotted line: calculated ECD data (5*R*, 6*R*, 9*R*, 11*S*, 14*R*).

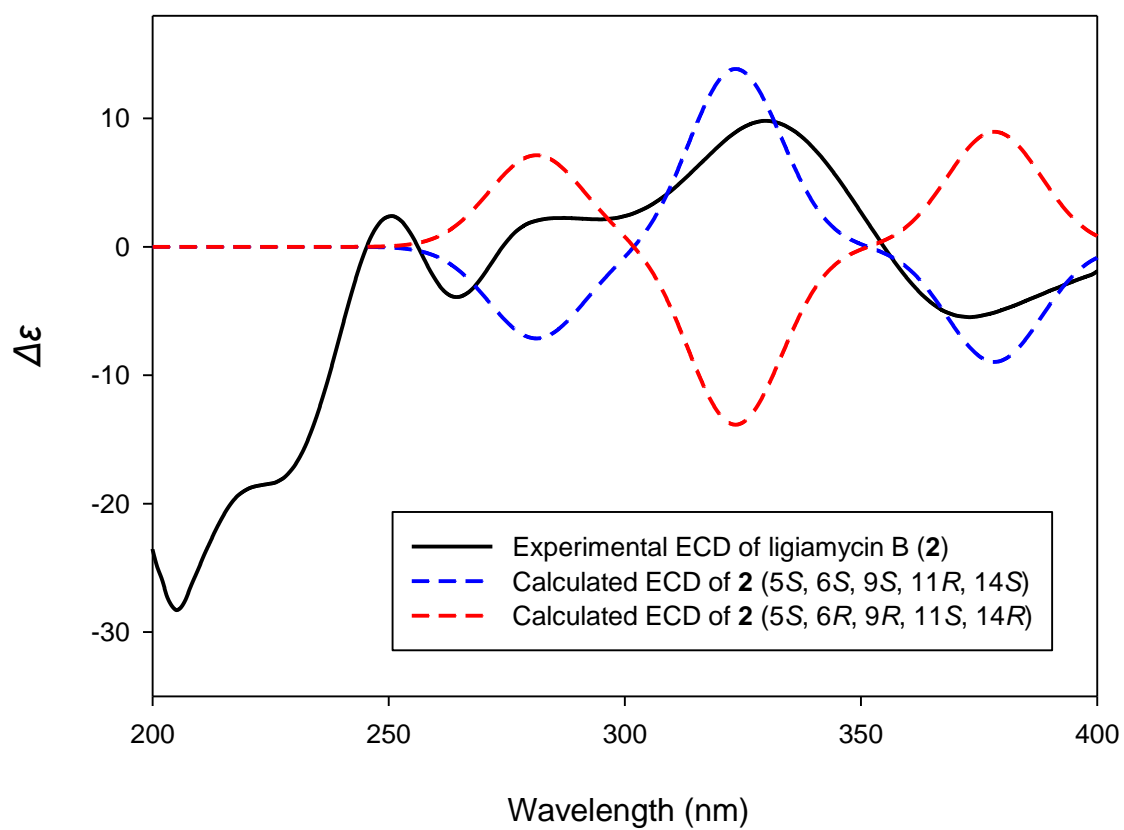



### Proposed biosynthetic pathway of ligiamycins A (1) and B (2).

The core structures of ligiamycins A (1) and B (2) could be biosynthesized by a polyketide synthase-nonribosomal peptide synthetase (PKS-NRPS) hybrid pathway like the oxaleimides [1]. The decalin moiety could be cyclized through Diels-Alder cyclization. Cyclization and dehydration could be occurred to form a five membered maleimide ring. A further amination step is proposed to produce ligiamycin A (1) and subsequent oxidation could convert ligiamycin A (1) to ligiamycin B (2) (Scheme S1).

**Scheme S1.** Proposed biosynthetic pathway of ligiamycins. PKS-NRPS domain abbreviations: KS: ketosynthase; DH: dehydratase; MT: methyltransferase; KR: ketoreductases; ACP: acyl carrier protein; C: condensation; A: adenylation; T: thiolation; R: reductase; ER: enoylreductase.

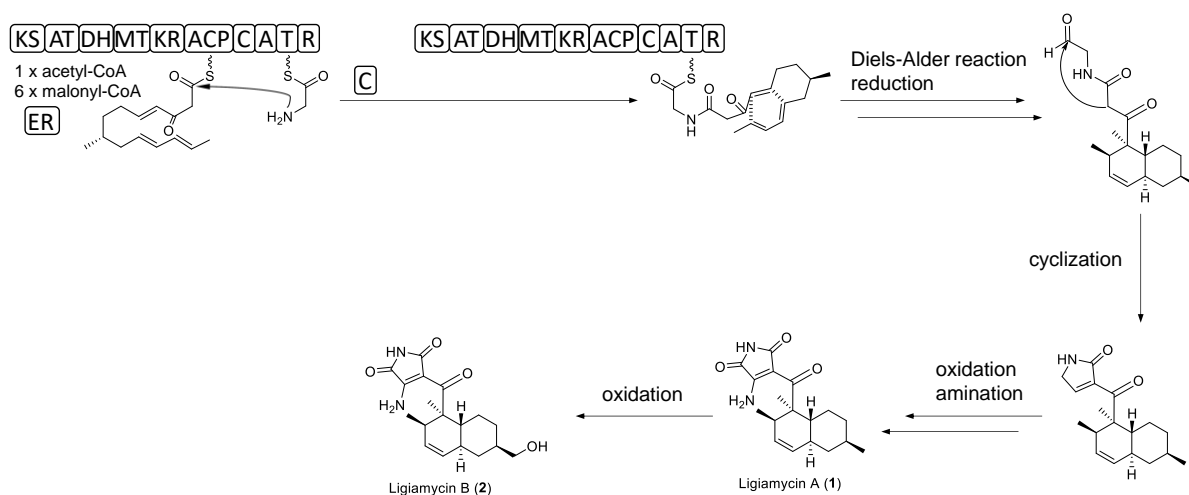

### Reference

- [1] Sato, M.; Dander, J.E.; Sato, C.; Hung, Y.-S.; Gao, S.-S.; Tang, M.-C.; Hang, L.; Winter, J.M.; Garg, N.K.; Watanabe, K.; et al. Collaborative biosynthesis of maleimide- and succinimide-containing natural products by fungal polyketide megasynthases. *J. Am. Chem. Soc.* **2017**, *139*, 5317–5320.
